# Supplementary material for: Anticorrelation of net uptake of atmospheric CO 2 by the world ocean and terrestrial biosphere in current carbon cycle models
Source: Copernicus journal article supplement (doi:10.5194/bg-21-5045-2024), 2024-11-15
Supplement: Supplementary file 1 [file bg-21-5045-2024-supplement.zip]

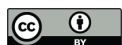

*Supplement of*

## **Anticorrelation of net uptake of atmospheric CO<sub>2</sub> by the world ocean and terrestrial biosphere in current carbon cycle models**

**Stephen E. Schwartz**

*Correspondence to:* Stephen E. Schwartz ([stephen.schwartz@stonybrook.edu](mailto:stephen.schwartz@stonybrook.edu))

- [bg-21-5045-2024-supplement-title-page.pdf](#)
- [DataSheetFigsSchwartzAntcorrelation.xls](#)

The copyright of individual parts of the supplement might differ from the article licence.
